# Supplementary material for: Thiosulfinate-Enriched Allium sativum Extract Exhibits Differential Effects between Healthy and Sepsis Patients: The Implication of HIF-1α
Source: MDPI journal article supplement (doi:10.3390/ijms24076234), 2023-03-25
Supplement: s1 [file s1]

## **SUPPLEMENTAL INFORMATION**

### **Thiosulfinate-Enriched *Allium sativum* extract exhibits differential effects between healthy and sepsis patients: the implication of HIF-1 $\alpha$**

José Avendaño-Ortiz, Francisco Javier Redondo-Calvo, Roberto Lozano-Rodríguez, Verónica Terrón-Arcos, Marta Bergón-Gutiérrez, Concepción Rodríguez-Jiménez, Juan Francisco Rodríguez, Rosa del Campo, Luis Antonio Gómez, Natalia Bejarano-Ramírez, José Manuel Pérez-Ortiz, Eduardo López-Collazo.

## Supplementary Figure S1

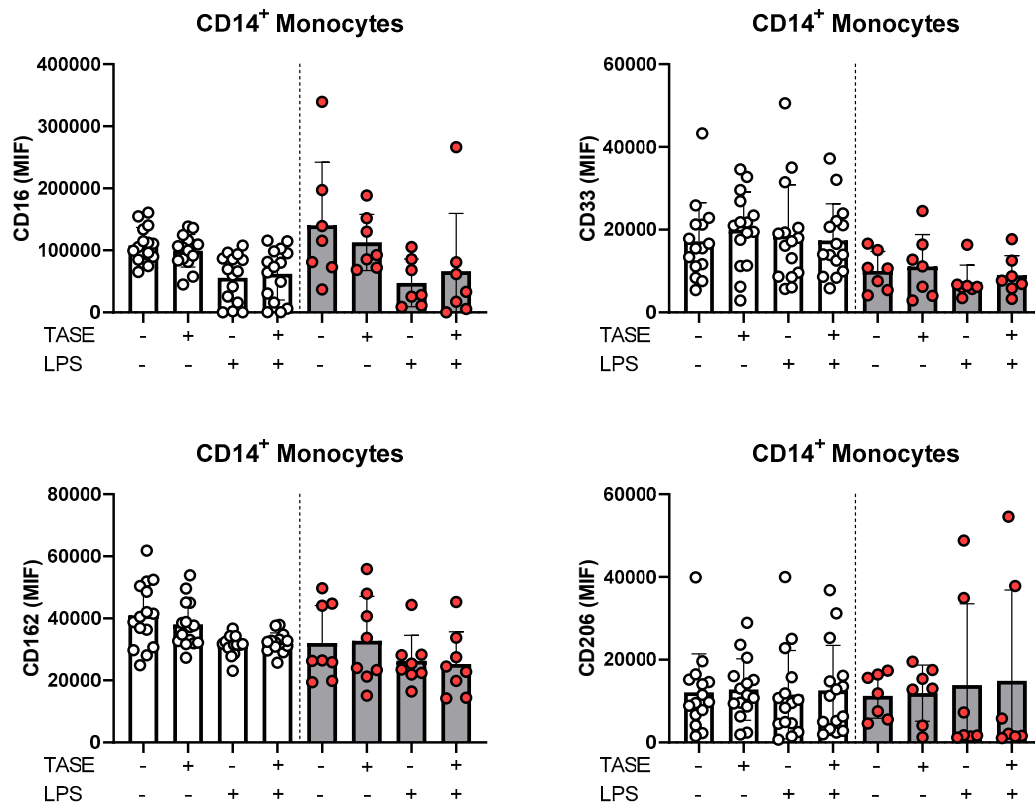

**Supplementary Figure S1. Immune markers expression in monocytes from both HV and sepsis patients treated with garlic extract and LPS.** Monocytes from HV (n=15) and sepsis (n=7) were stimulated with 10 ng/mL for 16 h in combination or not with 3 µg/mL of thiosulfate-enriched *Allium sativum* extract (TASE) and labelled with cytometry antibodies. Mean intensities of fluorescence of CD16, CD33, CD162 and CD206 on gated CD14<sup>+</sup> monocytes determined by flow cytometry are shown. Dots show individual values and bars express mean±SD.

## Supplementary Figure S2

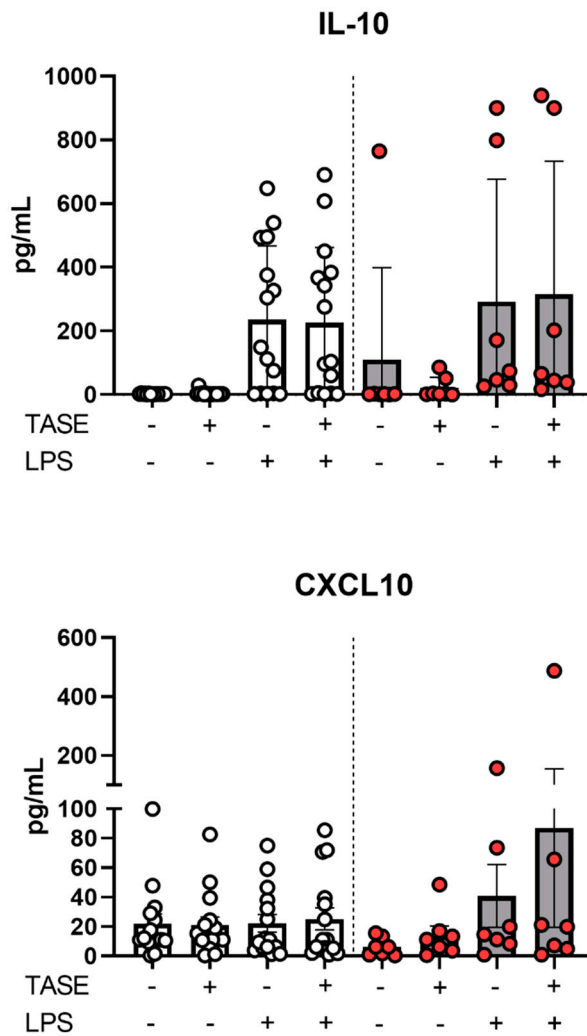

**Supplementary Figure S2. Cytokine production in monocytes from both HV and sepsis patients treated with garlic extract and LPS.** Monocytes from HV (n=15) and sepsis (n=7) were stimulated with 10 ng/mL of LPS for 16 h in combination or not with 3  $\mu$ g/mL of thiosulfinate-enriched *Allium sativum* extract (TASE). Inflammatory cytokine levels of IL-10 and CXCL10 in cell culture supernatant were measured. Concentrations are shown. \*,  $p < 0.05$  in paired Wilcoxon t test. Dots show individual values and bars express mean  $\pm$  SD.

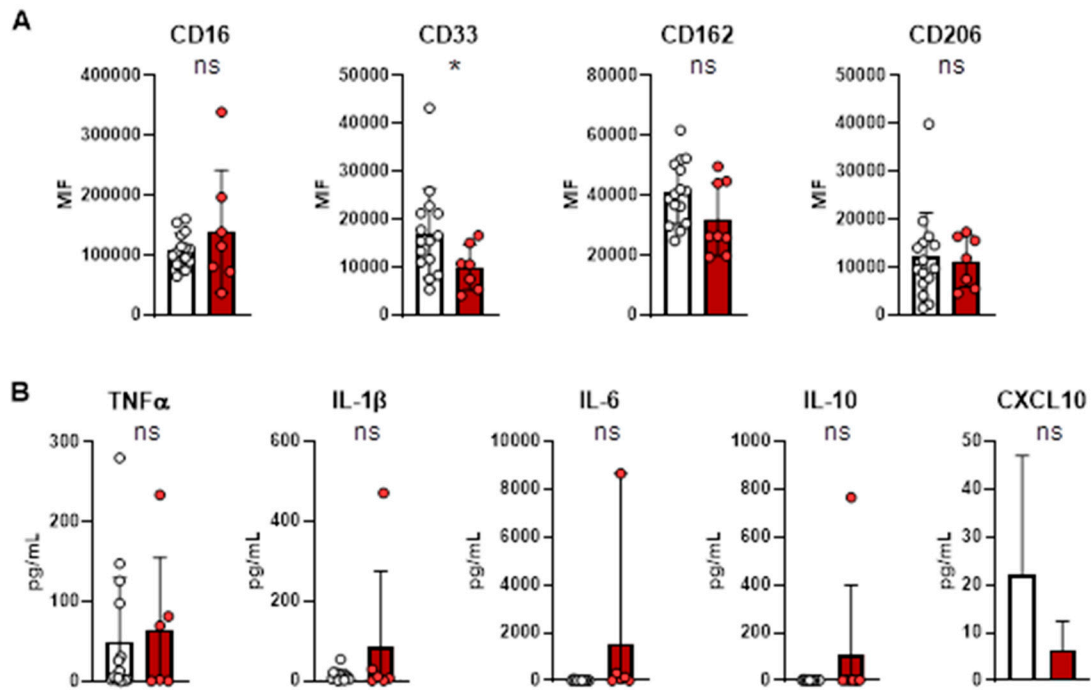

**Supplementary Figure S3. Membrane marker expression and cytokine levels in supernatants of monocytes from both HV and sepsis patients in basal control condition.** Monocytes from HV (n=15) and sepsis (n=7) were culture with complete RMPI and leave untreated for 16 h. A. Mean intensities of fluorescence of CD16, CD33, CD162 and CD206 on gated CD14<sup>+</sup> monocytes determined by flow cytometry are shown. B. Levels of TNFα, IL-1β, IL-6, IL-10 and CXCL10 in cell culture supernatant are shown. \*,  $p < 0.05$  and ns, non-significant in unpaired t test. Dots show individual values and bars express mean ± SD.
